# Supplementary material for: A network-based approach to uncover microRNA-mediated disease comorbidities and potential pathobiological implications
Source: PubMed Central journal article supplement (PMC6853960; doi:10.1038/s41540-019-0115-2), 2019-11-13
Supplement: 41540_2019_115_MOESM1_ESM.pdf [file 41540_2019_115_MOESM1_ESM.pdf]

**Supplementary Table 1:** The top 300 pairs of the highest similarity disease pairs obtained by miRNA-overlap measure and mpDisNet.

| Source                                        | Target                                        | similarity |
|-----------------------------------------------|-----------------------------------------------|------------|
| Arthritis, Juvenile Rheumatoid                | Alcoholism                                    | 0.5        |
| Autoimmune Lymphoproliferative Syndrome       | Alcoholism                                    | 0.5        |
| Carcinoma, Neuroendocrine                     | Astrocytoma                                   | 0.6666667  |
| Carcinoma, Renal Cell                         | Carcinoma, Hepatocellular                     | 0.3502825  |
| Carcinoma, Transitional Cell                  | Bronchiolitis Obliterans                      | 0.5        |
| Chlamydia Infections                          | Alcoholism                                    | 1          |
| Chlamydia Infections                          | Arthritis, Juvenile Rheumatoid                | 0.5        |
| Chlamydia Infections                          | Autoimmune Lymphoproliferative Syndrome       | 0.5        |
| Choriocarcinoma                               | Barrett Esophagus                             | 0.4117647  |
| Choriocarcinoma                               | Carcinoma, Endometrioid                       | 0.3513514  |
| Colorectal Neoplasms                          | Cardiomyopathy, Hypertrophic                  | 0.3482143  |
| Colorectal Neoplasms, Hereditary Nonpolyposis | Angina, Unstable                              | 0.5        |
| Congenital Hypothyroidism                     | Cerebrovascular Disorders                     | 1          |
| Coronary Restenosis                           | Alcoholism                                    | 1          |
| Coronary Restenosis                           | Arthritis, Juvenile Rheumatoid                | 0.5        |
| Coronary Restenosis                           | Autoimmune Lymphoproliferative Syndrome       | 0.5        |
| Coronary Restenosis                           | Chlamydia Infections                          | 1          |
| Creutzfeldt-Jakob Syndrome                    | Alcoholism                                    | 1          |
| Creutzfeldt-Jakob Syndrome                    | Arthritis, Juvenile Rheumatoid                | 0.5        |
| Creutzfeldt-Jakob Syndrome                    | Autoimmune Lymphoproliferative Syndrome       | 0.5        |
| Creutzfeldt-Jakob Syndrome                    | Chlamydia Infections                          | 1          |
| Creutzfeldt-Jakob Syndrome                    | Coronary Restenosis                           | 1          |
| Demyelinating Diseases                        | Carcinoma, Neuroendocrine                     | 0.5        |
| Dermatitis, Allergic Contact                  | Carcinoma, Neuroendocrine                     | 0.6666667  |
| Dermatitis, Allergic Contact                  | Colorectal Neoplasms, Hereditary Nonpolyposis | 0.5        |
| Dermatitis, Allergic Contact                  | Demyelinating Diseases                        | 0.6666667  |
| Encephalitis                                  | Colorectal Neoplasms, Hereditary Nonpolyposis | 0.5        |
| Focal Epithelial Hyperplasia                  | Astrocytoma                                   | 0.5        |
| Focal Epithelial Hyperplasia                  | Autoimmune Lymphoproliferative Syndrome       | 0.5        |
| Focal Epithelial Hyperplasia                  | Carcinoma, Ductal                             | 0.5        |
| Focal Epithelial Hyperplasia                  | Corneal Dystrophies, Hereditary               | 0.5        |
| Focal Epithelial Hyperplasia                  | Dermatitis, Allergic Contact                  | 0.5        |
| Gastritis, Atrophic                           | Angina, Unstable                              | 0.5        |
| Gastritis, Atrophic                           | Colorectal Neoplasms, Hereditary Nonpolyposis | 1          |
| Gastritis, Atrophic                           | Dermatitis, Allergic Contact                  | 0.5        |
| Gastritis, Atrophic                           | Encephalitis                                  | 0.5        |
| Gastrointestinal Stromal Tumors               | Brain Neoplasms                               | 0.4347826  |
| Gaucher Disease                               | Angina, Unstable                              | 0.5        |
| Gaucher Disease                               | Colorectal Neoplasms, Hereditary Nonpolyposis | 1          |
| Gaucher Disease                               | Dermatitis, Allergic Contact                  | 0.5        |
| Gaucher Disease                               | Encephalitis                                  | 0.5        |
| Gaucher Disease                               | Gastritis, Atrophic                           | 1          |
| Glioma                                        | Carcinoma, Hepatocellular                     | 0.4227642  |
| Glioma                                        | Carcinoma, Renal Cell                         | 0.3991228  |
| Glioma                                        | Colorectal Neoplasms                          | 0.3489583  |
| Hamartoma                                     | Adenoma                                       | 1          |
| Hamartoma Syndrome, Multiple                  | Focal Epithelial Hyperplasia                  | 0.5        |
| Hearing Loss                                  | Fatigue Syndrome, Chronic                     | 1          |
| Hemoglobinopathies                            | Chorioamnionitis                              | 0.5        |
| Hepatitis, Autoimmune                         | Focal Epithelial Hyperplasia                  | 0.5        |
| Hyperuricemia                                 | Fatigue Syndrome, Chronic                     | 1          |
| Hyperuricemia                                 | Hearing Loss                                  | 1          |
| Hypogonadism                                  | Hyperaldosteronism                            | 1          |
| Ileus                                         | Hamartoma Syndrome, Multiple                  | 0.5        |
| Immune System Diseases                        | Hypersensitivity                              | 0.35       |

|                                 |                                         |           |
|---------------------------------|-----------------------------------------|-----------|
| Insulinoma                      | Coloboma                                | 1         |
| Intermittent Claudication       | Brucellosis                             | 0.5       |
| Legg-Perthes Disease            | Encephalitis                            | 0.5       |
| Leprosy                         | Alcoholism                              | 0.5       |
| Leprosy                         | Autoimmune Lymphoproliferative Syndrome | 1         |
| Leprosy                         | Chlamydia Infections                    | 0.5       |
| Leprosy                         | Coronary Restenosis                     | 0.5       |
| Leprosy                         | Creutzfeldt-Jakob Syndrome              | 0.5       |
| Leprosy                         | Focal Epithelial Hyperplasia            | 0.5       |
| Leprosy, Lepromatous            | Astrocytoma                             | 0.5       |
| Leprosy, Lepromatous            | Autoimmune Lymphoproliferative Syndrome | 0.5       |
| Leprosy, Lepromatous            | Carcinoma, Ductal                       | 0.5       |
| Leprosy, Lepromatous            | Corneal Dystrophies, Hereditary         | 0.5       |
| Leprosy, Lepromatous            | Dermatitis, Allergic Contact            | 0.5       |
| Leprosy, Lepromatous            | Focal Epithelial Hyperplasia            | 1         |
| Leprosy, Lepromatous            | Hamartoma Syndrome, Multiple            | 0.5       |
| Leprosy, Lepromatous            | Hepatitis, Autoimmune                   | 0.5       |
| Leprosy, Lepromatous            | Leprosy                                 | 0.5       |
| Leukemia, Lymphocytic, Acute    | Arthritis, Rheumatoid                   | 0.375     |
| Leukemia, Megakaryocytic, Acute | Fatigue Syndrome, Chronic               | 0.5       |
| Leukemia, Megakaryocytic, Acute | Hearing Loss                            | 0.5       |
| Leukemia, Megakaryocytic, Acute | Hyperuricemia                           | 0.5       |
| Leukemia, Myelocytic, Acute     | Carcinoma, Renal Cell                   | 0.40625   |
| Leukemia, Myelocytic, Acute     | Glioma                                  | 0.3903509 |
| Leukemia, Myelocytic, Acute     | Leukemia, Lymphocytic, Acute            | 0.415493  |
| Leukemia, Promyelocytic, Acute  | Carcinoma, Non-Small-Cell Lung          | 0.40625   |
| Lichen Planus                   | Dermatitis, Atopic                      | 0.3636364 |
| Lung Neoplasms                  | Breast Neoplasms                        | 0.3404255 |
| Lung Neoplasms                  | Carcinoma, Renal Cell                   | 0.4055556 |
| Lung Neoplasms                  | Colorectal Neoplasms                    | 0.3884892 |
| Lung Neoplasms                  | Glioma                                  | 0.3574661 |
| Lung Neoplasms                  | Leukemia, Myelocytic, Acute             | 0.3791209 |
| Lupus Erythematosus, Systemic   | Breast Neoplasms                        | 0.3431373 |
| Lyme Disease                    | Chorioamnionitis                        | 1         |
| Lyme Disease                    | Hemoglobinopathies                      | 0.5       |
| Lymphoma, B-Cell                | Burkitt Lymphoma                        | 0.3863636 |
| Lymphoma, T-Cell, Cutaneous     | Dermatitis, Allergic Contact            | 0.4       |
| Melanoma                        | Carcinoma, Hepatocellular               | 0.4540682 |
| Melanoma                        | Carcinoma, Renal Cell                   | 0.4380165 |
| Melanoma                        | Glioma                                  | 0.4522059 |
| Melanoma                        | Leukemia, Myelocytic, Acute             | 0.3895582 |
| Melanoma                        | Lung Neoplasms                          | 0.3483607 |
| MELAS Syndrome                  | Fatigue Syndrome, Chronic               | 1         |
| MELAS Syndrome                  | Hearing Loss                            | 1         |
| MELAS Syndrome                  | Hyperuricemia                           | 1         |
| MELAS Syndrome                  | Leukemia, Megakaryocytic, Acute         | 0.5       |
| Meningitis                      | Alcoholism                              | 1         |
| Meningitis                      | Arthritis, Juvenile Rheumatoid          | 0.5       |
| Meningitis                      | Autoimmune Lymphoproliferative Syndrome | 0.5       |
| Meningitis                      | Chlamydia Infections                    | 1         |
| Meningitis                      | Coronary Restenosis                     | 1         |
| Meningitis                      | Creutzfeldt-Jakob Syndrome              | 1         |
| Meningitis                      | Leprosy                                 | 0.5       |
| Metabolic Diseases              | Fatigue Syndrome, Chronic               | 0.5       |
| Metabolic Diseases              | Hearing Loss                            | 0.5       |
| Metabolic Diseases              | Hyperuricemia                           | 0.5       |

|                                              |                                               |           |
|----------------------------------------------|-----------------------------------------------|-----------|
| Metabolic Diseases                           | MELAS Syndrome                                | 0.5       |
| Multiple Myeloma                             | Leukemia, Lymphocytic, Acute                  | 0.3510638 |
| Muscular Dystrophy, Duchenne                 | Dermatomyositis                               | 0.4482759 |
| Mycobacterium avium-intracellulare Infection | Alcoholism                                    | 1         |
| Mycobacterium avium-intracellulare Infection | Arthritis, Juvenile Rheumatoid                | 0.5       |
| Mycobacterium avium-intracellulare Infection | Autoimmune Lymphoproliferative Syndrome       | 0.5       |
| Mycobacterium avium-intracellulare Infection | Chlamydia Infections                          | 1         |
| Mycobacterium avium-intracellulare Infection | Coronary Restenosis                           | 1         |
| Mycobacterium avium-intracellulare Infection | Creutzfeldt-Jakob Syndrome                    | 1         |
| Mycobacterium avium-intracellulare Infection | Leprosy                                       | 0.5       |
| Mycobacterium avium-intracellulare Infection | Meningitis                                    | 1         |
| Myelodysplastic Syndromes                    | Aneurysm                                      | 0.3623188 |
| Myocardial Infarction                        | Atherosclerosis                               | 0.3508772 |
| Myocardial Infarction                        | Cardiomyopathy, Hypertrophic                  | 0.3627451 |
| Myoma                                        | Adenoma                                       | 1         |
| Myoma                                        | Hamartoma                                     | 1         |
| Myopia                                       | Dyspepsia                                     | 1         |
| Nephrolithiasis                              | Angina, Unstable                              | 0.5       |
| Nephrolithiasis                              | Colorectal Neoplasms, Hereditary Nonpolyposis | 1         |
| Nephrolithiasis                              | Dermatitis, Allergic Contact                  | 0.5       |
| Nephrolithiasis                              | Encephalitis                                  | 0.5       |
| Nephrolithiasis                              | Gastritis, Atrophic                           | 1         |
| Nephrolithiasis                              | Gaucher Disease                               | 1         |
| Neutropenia                                  | Focal Epithelial Hyperplasia                  | 0.5       |
| Neutropenia                                  | Leprosy, Lepromatous                          | 0.5       |
| Oligodendroglioma                            | Mental Retardation                            | 1         |
| Oral Submucous Fibrosis                      | Focal Epithelial Hyperplasia                  | 0.5       |
| Oral Submucous Fibrosis                      | Leprosy, Lepromatous                          | 0.5       |
| Osteonecrosis                                | Carcinoma, Transitional Cell                  | 0.5       |
| Osteonecrosis                                | Complex Regional Pain Syndromes               | 0.5       |
| Osteonecrosis                                | Neurotoxicity Syndromes                       | 0.5       |
| Osteopetrosis                                | Dyspepsia                                     | 0.5       |
| Osteopetrosis                                | Myopia                                        | 0.5       |
| Osteosarcoma                                 | Carcinoma, Hepatocellular                     | 0.3611111 |
| Osteosarcoma                                 | Carcinoma, Renal Cell                         | 0.3719807 |
| Osteosarcoma                                 | Colorectal Neoplasms                          | 0.3575758 |
| Osteosarcoma                                 | Glioma                                        | 0.4329004 |
| Osteosarcoma                                 | Leukemia, Myelocytic, Acute                   | 0.3492823 |
| Osteosarcoma                                 | Lung Neoplasms                                | 0.4095745 |
| Osteosarcoma                                 | Melanoma                                      | 0.3846154 |
| Periodontal Diseases                         | Dermatitis, Atopic                            | 0.3846154 |
| Peripheral Nervous System Diseases           | Autoimmune Lymphoproliferative Syndrome       | 0.6666667 |
| Peripheral Nervous System Diseases           | Carcinoma, Neuroendocrine                     | 0.5       |
| Peripheral Nervous System Diseases           | Demyelinating Diseases                        | 0.5       |
| Peripheral Nervous System Diseases           | Dermatitis, Allergic Contact                  | 0.6666667 |
| Peripheral Nervous System Diseases           | Glomerulonephritis, IGA                       | 0.5       |
| Peripheral Nervous System Diseases           | Leprosy                                       | 0.6666667 |
| Peripheral Nervous System Diseases           | Lichen Planus                                 | 0.375     |
| Pneumonia                                    | Lichen Planus                                 | 0.375     |
| Pneumonia                                    | Peripheral Nervous System Diseases            | 0.5       |
| Primary Myelofibrosis                        | Chorioamnionitis                              | 0.5       |
| Primary Myelofibrosis                        | Lyme Disease                                  | 0.5       |
| Primary Myelofibrosis                        | Otitis Media                                  | 0.5       |
| Prostatic Neoplasms                          | Carcinoma, Renal Cell                         | 0.3480392 |
| Prostatic Neoplasms                          | Glioma                                        | 0.3416667 |
| Prostatic Neoplasms                          | Leukemia, Myelocytic, Acute                   | 0.3514851 |

|                                        |                                               |           |
|----------------------------------------|-----------------------------------------------|-----------|
| Prostatic Neoplasms                    | Lung Neoplasms                                | 0.3403141 |
| Prostatic Neoplasms                    | Osteosarcoma                                  | 0.3537736 |
| Pulmonary Heart Disease                | Alcoholism                                    | 1         |
| Pulmonary Heart Disease                | Arthritis, Juvenile Rheumatoid                | 0.5       |
| Pulmonary Heart Disease                | Autoimmune Lymphoproliferative Syndrome       | 0.5       |
| Pulmonary Heart Disease                | Chlamydia Infections                          | 1         |
| Pulmonary Heart Disease                | Coronary Restenosis                           | 1         |
| Pulmonary Heart Disease                | Creutzfeldt-Jakob Syndrome                    | 1         |
| Pulmonary Heart Disease                | Leprosy                                       | 0.5       |
| Pulmonary Heart Disease                | Meningitis                                    | 1         |
| Pulmonary Heart Disease                | Mycobacterium avium-intracellulare Infection  | 1         |
| Retinitis Pigmentosa                   | Attention Deficit Disorder with Hyperactivity | 0.375     |
| Salivary Gland Diseases                | Astrocytoma                                   | 0.5       |
| Salivary Gland Diseases                | Autoimmune Lymphoproliferative Syndrome       | 0.5       |
| Salivary Gland Diseases                | Carcinoma, Ductal                             | 0.5       |
| Salivary Gland Diseases                | Corneal Dystrophies, Hereditary               | 0.5       |
| Salivary Gland Diseases                | Dermatitis, Allergic Contact                  | 0.5       |
| Salivary Gland Diseases                | Focal Epithelial Hyperplasia                  | 1         |
| Salivary Gland Diseases                | Hamartoma Syndrome, Multiple                  | 0.5       |
| Salivary Gland Diseases                | Hepatitis, Autoimmune                         | 0.5       |
| Salivary Gland Diseases                | Leprosy                                       | 0.5       |
| Salivary Gland Diseases                | Leprosy, Lepromatous                          | 1         |
| Salivary Gland Diseases                | Neutropenia                                   | 0.5       |
| Salivary Gland Diseases                | Oral Submucous Fibrosis                       | 0.5       |
| Schistosomiasis japonica               | Colitis                                       | 0.375     |
| Schistosomiasis japonica               | Primary Myelofibrosis                         | 0.5       |
| Seminoma                               | Cerebellar Neoplasms                          | 0.5       |
| Short Bowel Syndrome                   | Carcinoma, Transitional Cell                  | 0.5       |
| Short Bowel Syndrome                   | Malaria, Vivax                                | 0.5       |
| Skin Diseases                          | Sepsis                                        | 0.5       |
| Sleep Apnea, Obstructive               | Esophagitis                                   | 0.3333333 |
| Sleep Apnea, Obstructive               | Osteogenesis Imperfecta                       | 0.5       |
| Spondylitis, Ankylosing                | Glomerulonephritis, IGA                       | 0.4       |
| Spondylitis, Ankylosing                | Peripheral Nervous System Diseases            | 0.375     |
| Stomach Neoplasms                      | Carcinoma, Renal Cell                         | 0.3386243 |
| Stomach Neoplasms                      | Glioma                                        | 0.3513514 |
| Stomach Neoplasms                      | Lung Neoplasms                                | 0.3684211 |
| Stress Disorders, Post-Traumatic       | Liver Diseases, Alcoholic                     | 0.3333333 |
| Telangiectasia, Hereditary Hemorrhagic | Esophagitis                                   | 0.3333333 |
| Tetralogy of Fallot                    | Fatigue Syndrome, Chronic                     | 1         |
| Tetralogy of Fallot                    | Hearing Loss                                  | 1         |
| Tetralogy of Fallot                    | Hyperuricemia                                 | 1         |
| Tetralogy of Fallot                    | Intracranial Aneurysm                         | 0.3333333 |
| Tetralogy of Fallot                    | Leukemia, Megakaryocytic, Acute               | 0.5       |
| Tetralogy of Fallot                    | MELAS Syndrome                                | 1         |
| Tetralogy of Fallot                    | Metabolic Diseases                            | 0.5       |
| Thrombocythemia, Hemorrhagic           | Myeloproliferative Disorders                  | 0.3333333 |
| Thrombocytopenia                       | Angina, Unstable                              | 0.3333333 |
| Thrombocytopenia                       | Colorectal Neoplasms, Hereditary Nonpolyposis | 0.5       |
| Thrombocytopenia                       | Dermatitis, Allergic Contact                  | 0.3333333 |
| Thrombocytopenia                       | Encephalitis                                  | 0.3333333 |
| Thrombocytopenia                       | Fatigue Syndrome, Chronic                     | 0.5       |
| Thrombocytopenia                       | Gastritis, Atrophic                           | 0.5       |
| Thrombocytopenia                       | Gaucher Disease                               | 0.5       |
| Thrombocytopenia                       | Hearing Loss                                  | 0.5       |
| Thrombocytopenia                       | Hyperuricemia                                 | 0.5       |

|                                  |                                               |           |
|----------------------------------|-----------------------------------------------|-----------|
| Thrombocytopenia                 | Leukemia, Megakaryocytic, Acute               | 0.3333333 |
| Thrombocytopenia                 | MELAS Syndrome                                | 0.5       |
| Thrombocytopenia                 | Metabolic Diseases                            | 0.3333333 |
| Thrombocytopenia                 | Nephrolithiasis                               | 0.5       |
| Thrombocytopenia                 | Tetralogy of Fallot                           | 0.5       |
| Thrombocytosis                   | Alcoholism                                    | 0.5       |
| Thrombocytosis                   | Arthritis, Juvenile Rheumatoid                | 0.3333333 |
| Thrombocytosis                   | Autoimmune Lymphoproliferative Syndrome       | 0.3333333 |
| Thrombocytosis                   | Chlamydia Infections                          | 0.5       |
| Thrombocytosis                   | Coronary Restenosis                           | 0.5       |
| Thrombocytosis                   | Creutzfeldt-Jakob Syndrome                    | 0.5       |
| Thrombocytosis                   | Leprosy                                       | 0.3333333 |
| Thrombocytosis                   | Meningitis                                    | 0.5       |
| Thrombocytosis                   | Mycobacterium avium-intracellulare Infection  | 0.5       |
| Thrombocytosis                   | Osteogenesis Imperfecta                       | 0.3333333 |
| Thrombocytosis                   | Pulmonary Heart Disease                       | 0.5       |
| Thrombocytosis                   | Sleep Apnea, Obstructive                      | 0.5       |
| Thrombosis                       | Hemangiosarcoma                               | 0.4       |
| Thyroiditis, Autoimmune          | Colorectal Neoplasms, Hereditary Nonpolyposis | 0.3333333 |
| Thyroiditis, Autoimmune          | Gastritis, Atrophic                           | 0.3333333 |
| Thyroiditis, Autoimmune          | Gaucher Disease                               | 0.3333333 |
| Thyroiditis, Autoimmune          | Nephrolithiasis                               | 0.3333333 |
| Tourette Syndrome                | Osteomyelitis                                 | 0.5       |
| Toxoplasmosis                    | Lymphoma, Large-Cell, Ki-1                    | 0.4666667 |
| Uterine Cervical Neoplasms       | Carcinoma, Pancreatic Ductal                  | 0.3383459 |
| Uterine Cervical Neoplasms       | Glioma                                        | 0.354067  |
| Uterine Cervical Neoplasms       | Osteosarcoma                                  | 0.3405405 |
| Uterine Cervical Neoplasms       | Prostatic Neoplasms                           | 0.3579545 |
| Uterine Neoplasms                | Fatigue Syndrome, Chronic                     | 1         |
| Uterine Neoplasms                | Hearing Loss                                  | 1         |
| Uterine Neoplasms                | Hyperuricemia                                 | 1         |
| Uterine Neoplasms                | Intracranial Aneurysm                         | 0.3333333 |
| Uterine Neoplasms                | Leukemia, Megakaryocytic, Acute               | 0.5       |
| Uterine Neoplasms                | MELAS Syndrome                                | 1         |
| Uterine Neoplasms                | Metabolic Diseases                            | 0.5       |
| Uterine Neoplasms                | Tetralogy of Fallot                           | 1         |
| Uterine Neoplasms                | Thrombocytopenia                              | 0.5       |
| Uveitis                          | Alcoholism                                    | 1         |
| Uveitis                          | Arthritis, Juvenile Rheumatoid                | 0.5       |
| Uveitis                          | Arthritis, Psoriatic                          | 0.3333333 |
| Uveitis                          | Autoimmune Lymphoproliferative Syndrome       | 0.5       |
| Uveitis                          | Chlamydia Infections                          | 1         |
| Uveitis                          | Coronary Restenosis                           | 1         |
| Uveitis                          | Creutzfeldt-Jakob Syndrome                    | 1         |
| Uveitis                          | Leprosy                                       | 0.5       |
| Uveitis                          | Meningitis                                    | 1         |
| Uveitis                          | Mycobacterium avium-intracellulare Infection  | 1         |
| Uveitis                          | Peripheral Nervous System Diseases            | 0.3333333 |
| Uveitis                          | Pneumonia                                     | 0.3333333 |
| Uveitis                          | Pulmonary Heart Disease                       | 1         |
| Uveitis                          | Thrombocytosis                                | 0.5       |
| Uveomeningoencephalitic Syndrome | Alcoholism                                    | 1         |
| Uveomeningoencephalitic Syndrome | Arthritis, Juvenile Rheumatoid                | 0.5       |
| Uveomeningoencephalitic Syndrome | Arthritis, Psoriatic                          | 0.3333333 |
| Uveomeningoencephalitic Syndrome | Autoimmune Lymphoproliferative Syndrome       | 0.5       |
| Uveomeningoencephalitic Syndrome | Chlamydia Infections                          | 1         |

|                                  |                                               |           |
|----------------------------------|-----------------------------------------------|-----------|
| Uveomeningoencephalitic Syndrome | Coronary Restenosis                           | 1         |
| Uveomeningoencephalitic Syndrome | Creutzfeldt-Jakob Syndrome                    | 1         |
| Uveomeningoencephalitic Syndrome | Leprosy                                       | 0.5       |
| Uveomeningoencephalitic Syndrome | Meningitis                                    | 1         |
| Uveomeningoencephalitic Syndrome | Mycobacterium avium-intracellulare Infection  | 1         |
| Uveomeningoencephalitic Syndrome | Peripheral Nervous System Diseases            | 0.3333333 |
| Uveomeningoencephalitic Syndrome | Pneumonia                                     | 0.3333333 |
| Uveomeningoencephalitic Syndrome | Pulmonary Heart Disease                       | 1         |
| Uveomeningoencephalitic Syndrome | Thrombocytosis                                | 0.5       |
| Uveomeningoencephalitic Syndrome | Uveitis                                       | 1         |
| Varicocele                       | Arthritis, Psoriatic                          | 0.3333333 |
| Varicocele                       | Heart Valve Diseases                          | 0.5       |
| Varicocele                       | Polycystic Kidney Diseases                    | 0.5       |
| Vitiligo                         | Colorectal Neoplasms, Hereditary Nonpolyposis | 0.3333333 |
| Vitiligo                         | Gastritis, Atrophic                           | 0.3333333 |
| Vitiligo                         | Gaucher Disease                               | 0.3333333 |
| Vitiligo                         | Heart Defects, Congenital                     | 0.3333333 |
| Vitiligo                         | Nephrolithiasis                               | 0.3333333 |
| Vitiligo                         | Sleep Apnea, Obstructive                      | 0.3333333 |
| Vulvar Neoplasms                 | Polycystic Kidney Diseases                    | 0.5       |
| Vulvar Neoplasms                 | Severe Acute Respiratory Syndrome             | 0.3333333 |

| Source                | Target                        | similarity |
|-----------------------|-------------------------------|------------|
| Alzheimer Disease     | Atherosclerosis               | 0.98562754 |
| Alzheimer Disease     | Brain Diseases                | 0.98842779 |
| Alzheimer Disease     | Breast Neoplasms              | 0.985996   |
| Alzheimer Disease     | Carcinoma, Hepatocellular     | 0.98597672 |
| Alzheimer Disease     | Carcinoma, Squamous Cell      | 0.98399434 |
| Alzheimer Disease     | Coronary artery disease       | 0.9839721  |
| Alzheimer Disease     | Diabetes Mellitus             | 0.98970786 |
| Alzheimer Disease     | Diabetes Mellitus, Type 2     | 0.991973   |
| Alzheimer Disease     | Esophageal Neoplasms          | 0.9838278  |
| Alzheimer Disease     | Hepatitis B                   | 0.98594711 |
| Alzheimer Disease     | Hepatitis C                   | 0.98402599 |
| Alzheimer Disease     | Hypertension                  | 0.9877321  |
| Alzheimer Disease     | Immune System Diseases        | 0.98363692 |
| Alzheimer Disease     | Kidney Failure, Chronic       | 0.98449754 |
| Alzheimer Disease     | Liver Neoplasms               | 0.98443263 |
| Alzheimer Disease     | Lung Neoplasms                | 0.9859086  |
| Alzheimer Disease     | Metabolic Syndrome X          | 0.98858764 |
| Alzheimer Disease     | Multiple Sclerosis            | 0.98456408 |
| Alzheimer Disease     | Myocardial Infarction         | 0.98601264 |
| Alzheimer Disease     | Obesity                       | 0.98794866 |
| Alzheimer Disease     | Osteoporosis                  | 0.9854498  |
| Alzheimer Disease     | Prostatic Neoplasms           | 0.9851983  |
| Alzheimer Disease     | Schizophrenia                 | 0.98464465 |
| Alzheimer Disease     | Stomach Neoplasms             | 0.98481312 |
| Anxiety Disorders     | Panic Disorder                | 0.98454806 |
| Arthritis, Rheumatoid | Diabetes Mellitus, Type 2     | 0.9843674  |
| Arthritis, Rheumatoid | Hepatitis B                   | 0.98706643 |
| Arthritis, Rheumatoid | Hepatitis C                   | 0.98632469 |
| Asthma                | Breast Neoplasms              | 0.98390865 |
| Asthma                | Carcinoma, Hepatocellular     | 0.98385279 |
| Asthma                | Diabetes Mellitus             | 0.98671575 |
| Asthma                | Diabetes Mellitus, Type 2     | 0.98718208 |
| Asthma                | Hepatitis B                   | 0.98736443 |
| Asthma                | Hepatitis C                   | 0.98536174 |
| Asthma                | Hypersensitivity              | 0.98483383 |
| Asthma                | Hypertension                  | 0.98619547 |
| Asthma                | Lung Neoplasms                | 0.98551194 |
| Asthma                | Lupus Erythematosus, Systemic | 0.98473574 |
| Asthma                | Lymphoma                      | 0.98406379 |
| Asthma                | Multiple Sclerosis            | 0.98543879 |
| Atherosclerosis       | Carcinoma, Hepatocellular     | 0.98366358 |
| Atherosclerosis       | Carcinoma, Squamous Cell      | 0.9837216  |
| Atherosclerosis       | Coronary artery disease       | 0.99185535 |
| Atherosclerosis       | Diabetes Mellitus             | 0.98753417 |
| Atherosclerosis       | Diabetes Mellitus, Type 2     | 0.988395   |
| Atherosclerosis       | Heart Diseases                | 0.98527068 |
| Atherosclerosis       | Hepatitis B                   | 0.98468887 |
| Atherosclerosis       | Hepatitis C                   | 0.98424177 |
| Atherosclerosis       | Hypertension                  | 0.98652581 |
| Atherosclerosis       | Ischemia                      | 0.98578906 |
| Atherosclerosis       | Kidney Failure, Chronic       | 0.98496804 |
| Atherosclerosis       | Liver Cirrhosis               | 0.98507848 |
| Atherosclerosis       | Metabolic Syndrome X          | 0.98661013 |
| Atherosclerosis       | Myocardial Infarction         | 0.98890541 |
| Atherosclerosis       | Obesity                       | 0.98590874 |

|                                |                                        |            |
|--------------------------------|----------------------------------------|------------|
| Atherosclerosis                | Pre-Eclampsia                          | 0.98385213 |
| Bipolar Disorder               | Schizophrenia                          | 0.98375155 |
| Brain Diseases                 | Diabetes Mellitus                      | 0.98627754 |
| Brain Diseases                 | Diabetes Mellitus, Type 2              | 0.98682982 |
| Brain Diseases                 | Hypertension                           | 0.98493099 |
| Brain Diseases                 | Obesity                                | 0.98452815 |
| Breast Neoplasms               | Carcinoma, Hepatocellular              | 0.98928784 |
| Breast Neoplasms               | Carcinoma, Squamous Cell               | 0.98742686 |
| Breast Neoplasms               | Colorectal Neoplasms                   | 0.98623983 |
| Breast Neoplasms               | Diabetes Mellitus                      | 0.98813999 |
| Breast Neoplasms               | Diabetes Mellitus, Type 2              | 0.98822106 |
| Breast Neoplasms               | Esophageal Neoplasms                   | 0.98775371 |
| Breast Neoplasms               | Glioma                                 | 0.9838862  |
| Breast Neoplasms               | Hepatitis B                            | 0.98741511 |
| Breast Neoplasms               | Hepatitis C                            | 0.98637204 |
| Breast Neoplasms               | Kidney Failure, Chronic                | 0.98746513 |
| Breast Neoplasms               | Liver Neoplasms                        | 0.98614945 |
| Breast Neoplasms               | Lung Neoplasms                         | 0.99041989 |
| Breast Neoplasms               | Lymphoma                               | 0.98595912 |
| Breast Neoplasms               | Multiple Sclerosis                     | 0.98443869 |
| Breast Neoplasms               | Obesity                                | 0.98548617 |
| Breast Neoplasms               | Ovarian Neoplasms                      | 0.99006673 |
| Breast Neoplasms               | Pancreatic Neoplasms                   | 0.98627686 |
| Breast Neoplasms               | Prostatic Neoplasms                    | 0.98675422 |
| Breast Neoplasms               | Pulmonary Disease, Chronic Obstructive | 0.98594764 |
| Breast Neoplasms               | Stomach Neoplasms                      | 0.98941171 |
| Breast Neoplasms               | Urinary Bladder Neoplasms              | 0.98818813 |
| Carcinoma, Hepatocellular      | Carcinoma, Squamous Cell               | 0.9859452  |
| Carcinoma, Hepatocellular      | Colorectal Neoplasms                   | 0.98403647 |
| Carcinoma, Hepatocellular      | Diabetes Mellitus                      | 0.98731845 |
| Carcinoma, Hepatocellular      | Diabetes Mellitus, Type 2              | 0.98772025 |
| Carcinoma, Hepatocellular      | Esophageal Neoplasms                   | 0.98582449 |
| Carcinoma, Hepatocellular      | Hepatitis B                            | 0.98546156 |
| Carcinoma, Hepatocellular      | Hepatitis C                            | 0.9842457  |
| Carcinoma, Hepatocellular      | Hypertension                           | 0.98476043 |
| Carcinoma, Hepatocellular      | Kidney Failure, Chronic                | 0.98585294 |
| Carcinoma, Hepatocellular      | Liver Neoplasms                        | 0.98566199 |
| Carcinoma, Hepatocellular      | Lung Neoplasms                         | 0.98853629 |
| Carcinoma, Hepatocellular      | Lymphoma                               | 0.98459665 |
| Carcinoma, Hepatocellular      | Metabolic Syndrome X                   | 0.9837493  |
| Carcinoma, Hepatocellular      | Multiple Sclerosis                     | 0.9836219  |
| Carcinoma, Hepatocellular      | Obesity                                | 0.98541108 |
| Carcinoma, Hepatocellular      | Pulmonary Disease, Chronic Obstructive | 0.98431585 |
| Carcinoma, Hepatocellular      | Stomach Neoplasms                      | 0.98682325 |
| Carcinoma, Non-Small-Cell Lung | Lung Neoplasms                         | 0.98729559 |
| Carcinoma, Non-Small-Cell Lung | Pulmonary Disease, Chronic Obstructive | 0.98396047 |
| Carcinoma, Squamous Cell       | Colorectal Neoplasms                   | 0.98447538 |
| Carcinoma, Squamous Cell       | Diabetes Mellitus                      | 0.98770947 |
| Carcinoma, Squamous Cell       | Diabetes Mellitus, Type 2              | 0.98702263 |
| Carcinoma, Squamous Cell       | Esophageal Neoplasms                   | 0.98855653 |
| Carcinoma, Squamous Cell       | Kidney Failure, Chronic                | 0.98493859 |
| Carcinoma, Squamous Cell       | Liver Neoplasms                        | 0.98453358 |
| Carcinoma, Squamous Cell       | Lung Neoplasms                         | 0.98904803 |
| Carcinoma, Squamous Cell       | Lymphoma                               | 0.98375845 |
| Carcinoma, Squamous Cell       | Metabolic Syndrome X                   | 0.98366132 |
| Carcinoma, Squamous Cell       | Obesity                                | 0.98417183 |



|                           |                                        |            |
|---------------------------|----------------------------------------|------------|
| Carcinoma, Squamous Cell  | Ovarian Neoplasms                      | 0.98795    |
| Carcinoma, Squamous Cell  | Pulmonary Disease, Chronic Obstructive | 0.98408943 |
| Carcinoma, Squamous Cell  | Stomach Neoplasms                      | 0.98663767 |
| Colitis, Ulcerative       | Inflammatory Bowel Diseases            | 0.98464622 |
| Colorectal Neoplasms      | Diabetes Mellitus, Type 2              | 0.98471294 |
| Colorectal Neoplasms      | Esophageal Neoplasms                   | 0.98372269 |
| Colorectal Neoplasms      | Lung Neoplasms                         | 0.98710033 |
| Colorectal Neoplasms      | Stomach Neoplasms                      | 0.98584402 |
| Coronary artery disease   | Diabetes Mellitus                      | 0.98774788 |
| Coronary artery disease   | Diabetes Mellitus, Type 2              | 0.98830804 |
| Coronary artery disease   | Heart Diseases                         | 0.98683927 |
| Coronary artery disease   | Hypertension                           | 0.98668095 |
| Coronary artery disease   | Ischemia                               | 0.98718149 |
| Coronary artery disease   | Metabolic Syndrome X                   | 0.98594584 |
| Coronary artery disease   | Myocardial Infarction                  | 0.98939826 |
| Coronary artery disease   | Obesity                                | 0.98435113 |
| Cystic Fibrosis           | Diabetes Mellitus                      | 0.98374554 |
| Cystic Fibrosis           | Hepatitis B                            | 0.98388221 |
| Diabetes Mellitus         | Diabetes Mellitus, Type 2              | 0.99469607 |
| Diabetes Mellitus         | Esophageal Neoplasms                   | 0.98606355 |
| Diabetes Mellitus         | Glioma                                 | 0.98442763 |
| Diabetes Mellitus         | Heart Diseases                         | 0.98443804 |
| Diabetes Mellitus         | Hepatitis B                            | 0.98780111 |
| Diabetes Mellitus         | Hepatitis C                            | 0.98663583 |
| Diabetes Mellitus         | Hypertension                           | 0.99031488 |
| Diabetes Mellitus         | Kidney Failure, Chronic                | 0.98926471 |
| Diabetes Mellitus         | Liver Cirrhosis                        | 0.98531768 |
| Diabetes Mellitus         | Liver Neoplasms                        | 0.98617211 |
| Diabetes Mellitus         | Lung Neoplasms                         | 0.98845898 |
| Diabetes Mellitus         | Lymphoma                               | 0.98658381 |
| Diabetes Mellitus         | Lymphoma, Non-Hodgkin                  | 0.98379638 |
| Diabetes Mellitus         | Melanoma                               | 0.98425359 |
| Diabetes Mellitus         | Metabolic Syndrome X                   | 0.98983602 |
| Diabetes Mellitus         | Multiple Sclerosis                     | 0.98596851 |
| Diabetes Mellitus         | Myocardial Infarction                  | 0.98899695 |
| Diabetes Mellitus         | Obesity                                | 0.99123846 |
| Diabetes Mellitus         | Osteoporosis                           | 0.98514184 |
| Diabetes Mellitus         | Ovarian Neoplasms                      | 0.98369593 |
| Diabetes Mellitus         | Prostatic Neoplasms                    | 0.98447682 |
| Diabetes Mellitus         | Pulmonary Disease, Chronic Obstructive | 0.98422339 |
| Diabetes Mellitus         | Schizophrenia                          | 0.98516946 |
| Diabetes Mellitus         | Stomach Neoplasms                      | 0.98502862 |
| Diabetes Mellitus         | Urinary Bladder Neoplasms              | 0.9841696  |
| Diabetes Mellitus, Type 2 | Esophageal Neoplasms                   | 0.98681709 |
| Diabetes Mellitus, Type 2 | Glioma                                 | 0.98596246 |
| Diabetes Mellitus, Type 2 | Heart Diseases                         | 0.985219   |
| Diabetes Mellitus, Type 2 | Hepatitis B                            | 0.98832558 |
| Diabetes Mellitus, Type 2 | Hepatitis C                            | 0.98778228 |
| Diabetes Mellitus, Type 2 | Hypertension                           | 0.99235249 |
| Diabetes Mellitus, Type 2 | Immune System Diseases                 | 0.9855628  |
| Diabetes Mellitus, Type 2 | Ischemia                               | 0.98519213 |
| Diabetes Mellitus, Type 2 | Kidney Failure, Chronic                | 0.98889426 |
| Diabetes Mellitus, Type 2 | Liver Cirrhosis                        | 0.98589895 |
| Diabetes Mellitus, Type 2 | Liver Neoplasms                        | 0.98575674 |
| Diabetes Mellitus, Type 2 | Lung Neoplasms                         | 0.98941364 |
| Diabetes Mellitus, Type 2 | Lymphoma                               | 0.98675873 |

|                           |                                        |            |
|---------------------------|----------------------------------------|------------|
| Diabetes Mellitus, Type 2 | Lymphoma, Non-Hodgkin                  | 0.98392486 |
| Diabetes Mellitus, Type 2 | Melanoma                               | 0.98551011 |
| Diabetes Mellitus, Type 2 | Metabolic Syndrome X                   | 0.99191631 |
| Diabetes Mellitus, Type 2 | Multiple Sclerosis                     | 0.98787046 |
| Diabetes Mellitus, Type 2 | Myocardial Infarction                  | 0.98820351 |
| Diabetes Mellitus, Type 2 | Obesity                                | 0.99167324 |
| Diabetes Mellitus, Type 2 | Osteoporosis                           | 0.98552305 |
| Diabetes Mellitus, Type 2 | Ovarian Neoplasms                      | 0.98438309 |
| Diabetes Mellitus, Type 2 | Prostatic Neoplasms                    | 0.98644046 |
| Diabetes Mellitus, Type 2 | Pulmonary Disease, Chronic Obstructive | 0.98398821 |
| Diabetes Mellitus, Type 2 | Schizophrenia                          | 0.98580679 |
| Diabetes Mellitus, Type 2 | Stomach Neoplasms                      | 0.98641347 |
| Diabetes Mellitus, Type 2 | Urinary Bladder Neoplasms              | 0.98382826 |
| Endometrial Neoplasms     | Esophageal Neoplasms                   | 0.98379492 |
| Endometrial Neoplasms     | Ovarian Neoplasms                      | 0.98598974 |
| Endometrial Neoplasms     | Stomach Neoplasms                      | 0.98381219 |
| Esophageal Neoplasms      | Glioma                                 | 0.98417034 |
| Esophageal Neoplasms      | Kidney Failure, Chronic                | 0.98488328 |
| Esophageal Neoplasms      | Leukemia, B-Cell, Chronic              | 0.983749   |
| Esophageal Neoplasms      | Liver Neoplasms                        | 0.98465156 |
| Esophageal Neoplasms      | Lung Neoplasms                         | 0.98858184 |
| Esophageal Neoplasms      | Lymphoma                               | 0.98550773 |
| Esophageal Neoplasms      | Multiple Sclerosis                     | 0.98389392 |
| Esophageal Neoplasms      | Ovarian Neoplasms                      | 0.98644411 |
| Esophageal Neoplasms      | Prostatic Neoplasms                    | 0.98379283 |
| Esophageal Neoplasms      | Pulmonary Disease, Chronic Obstructive | 0.98521387 |
| Esophageal Neoplasms      | Stomach Neoplasms                      | 0.98616473 |
| Esophageal Neoplasms      | Urinary Bladder Neoplasms              | 0.98596149 |
| Glioma                    | Hepatitis B                            | 0.98432304 |
| Glioma                    | Hepatitis C                            | 0.98375806 |
| Glioma                    | Leukemia, Lymphocytic                  | 0.98635044 |
| Glioma                    | Leukemia, Lymphocytic, Acute           | 0.98622156 |
| Glioma                    | Leukemia, Myelocytic, Acute            | 0.98735386 |
| Glioma                    | Leukemia, Myeloid                      | 0.98444253 |
| Glioma                    | Lung Neoplasms                         | 0.98628562 |
| Glioma                    | Lymphoma                               | 0.98744839 |
| Glioma                    | Meningioma                             | 0.98569326 |
| Glioma                    | Stomach Neoplasms                      | 0.98393107 |
| Heart Diseases            | Hypertension                           | 0.98514483 |
| Heart Diseases            | Myocardial Infarction                  | 0.98418119 |
| Hepatitis B               | Hepatitis C                            | 0.99424676 |
| Hepatitis B               | Hypertension                           | 0.98474742 |
| Hepatitis B               | Kidney Failure, Chronic                | 0.98502951 |
| Hepatitis B               | Liver Cirrhosis                        | 0.98438928 |
| Hepatitis B               | Liver Neoplasms                        | 0.98562112 |
| Hepatitis B               | Lung Neoplasms                         | 0.98634105 |
| Hepatitis B               | Lupus Erythematosus, Systemic          | 0.98661302 |
| Hepatitis B               | Lymphoma                               | 0.98743847 |
| Hepatitis B               | Multiple Sclerosis                     | 0.98498974 |
| Hepatitis B               | Myocardial Infarction                  | 0.98421756 |
| Hepatitis B               | Obesity                                | 0.9842841  |
| Hepatitis C               | Hypertension                           | 0.98376861 |
| Hepatitis C               | Kidney Failure, Chronic                | 0.98396104 |
| Hepatitis C               | Leukemia, Lymphocytic, Acute           | 0.98385556 |
| Hepatitis C               | Liver Neoplasms                        | 0.98543883 |
| Hepatitis C               | Lung Neoplasms                         | 0.98509351 |

|                              |                                        |            |
|------------------------------|----------------------------------------|------------|
| Hepatitis C                  | Lupus Erythematosus, Systemic          | 0.98569311 |
| Hepatitis C                  | Lymphoma                               | 0.98575289 |
| Hepatitis C                  | Multiple Sclerosis                     | 0.9851868  |
| Hepatitis C                  | Myocardial Infarction                  | 0.98385469 |
| Hodgkin Disease              | Lymphoma                               | 0.98369552 |
| Hypertension                 | Ischemia                               | 0.98395914 |
| Hypertension                 | Kidney Failure, Chronic                | 0.98486644 |
| Hypertension                 | Liver Cirrhosis                        | 0.9837056  |
| Hypertension                 | Lung Neoplasms                         | 0.98580912 |
| Hypertension                 | Metabolic Syndrome X                   | 0.9877571  |
| Hypertension                 | Multiple Sclerosis                     | 0.98469119 |
| Hypertension                 | Myocardial Infarction                  | 0.98849478 |
| Hypertension                 | Obesity                                | 0.98972862 |
| Hypertension                 | Schizophrenia                          | 0.98426184 |
| Ischemia                     | Myocardial Infarction                  | 0.98365601 |
| Ischemia                     | Obesity                                | 0.98361726 |
| Kidney Failure, Chronic      | Liver Neoplasms                        | 0.98538638 |
| Kidney Failure, Chronic      | Lung Neoplasms                         | 0.9882643  |
| Kidney Failure, Chronic      | Lymphoma                               | 0.9853608  |
| Kidney Failure, Chronic      | Metabolic Syndrome X                   | 0.9856025  |
| Kidney Failure, Chronic      | Obesity                                | 0.98618486 |
| Kidney Failure, Chronic      | Ovarian Neoplasms                      | 0.98383828 |
| Kidney Failure, Chronic      | Pulmonary Disease, Chronic Obstructive | 0.98381058 |
| Kidney Failure, Chronic      | Stomach Neoplasms                      | 0.98610956 |
| Kidney Failure, Chronic      | Urinary Bladder Neoplasms              | 0.98512736 |
| Leukemia, B-Cell, Chronic    | Lung Neoplasms                         | 0.98906243 |
| Leukemia, B-Cell, Chronic    | Lymphoma                               | 0.98540092 |
| Leukemia, B-Cell, Chronic    | Stomach Neoplasms                      | 0.9844053  |
| Leukemia, Lymphocytic        | Leukemia, Lymphocytic, Acute           | 0.99105228 |
| Leukemia, Lymphocytic        | Leukemia, Myelocytic, Acute            | 0.98779971 |
| Leukemia, Lymphocytic        | Leukemia, Myeloid                      | 0.98498096 |
| Leukemia, Lymphocytic        | Lymphoma                               | 0.98568274 |
| Leukemia, Lymphocytic, Acute | Leukemia, Myelocytic, Acute            | 0.98794955 |
| Leukemia, Lymphocytic, Acute | Leukemia, Myeloid                      | 0.98416459 |
| Leukemia, Lymphocytic, Acute | Lymphoma                               | 0.98501226 |
| Leukemia, Myelocytic, Acute  | Leukemia, Myeloid                      | 0.98813992 |
| Leukemia, Myelocytic, Acute  | Lymphoma                               | 0.98581247 |
| Leukemia, Myelocytic, Acute  | Meningioma                             | 0.98467326 |
| Leukemia, Myeloid            | Lymphoma                               | 0.98444336 |
| Liver Cirrhosis              | Lung Neoplasms                         | 0.98360323 |
| Liver Cirrhosis              | Myocardial Infarction                  | 0.98381838 |
| Liver Neoplasms              | Lung Neoplasms                         | 0.98716106 |
| Liver Neoplasms              | Obesity                                | 0.98482561 |
| Liver Neoplasms              | Pulmonary Disease, Chronic Obstructive | 0.9854322  |
| Liver Neoplasms              | Stomach Neoplasms                      | 0.98517454 |
| Liver Neoplasms              | Urinary Bladder Neoplasms              | 0.98390591 |
| Lung Neoplasms               | Lymphoma                               | 0.98720749 |
| Lung Neoplasms               | Lymphoma, Non-Hodgkin                  | 0.98441362 |
| Lung Neoplasms               | Metabolic Syndrome X                   | 0.98432669 |
| Lung Neoplasms               | Multiple Sclerosis                     | 0.98488523 |
| Lung Neoplasms               | Obesity                                | 0.98639819 |
| Lung Neoplasms               | Ovarian Neoplasms                      | 0.9873794  |
| Lung Neoplasms               | Pancreatic Neoplasms                   | 0.98442212 |
| Lung Neoplasms               | Prostatic Neoplasms                    | 0.98530727 |
| Lung Neoplasms               | Pulmonary Disease, Chronic Obstructive | 0.98953975 |
| Lung Neoplasms               | Stomach Neoplasms                      | 0.98849811 |

|                                        |                                        |            |
|----------------------------------------|----------------------------------------|------------|
| Lung Neoplasms                         | Urinary Bladder Neoplasms              | 0.98865363 |
| Lupus Erythematosus, Systemic          | Lymphoma                               | 0.98420509 |
| Lymphoma                               | Lymphoma, Non-Hodgkin                  | 0.99013943 |
| Lymphoma                               | Multiple Myeloma                       | 0.98490546 |
| Lymphoma                               | Stomach Neoplasms                      | 0.98505788 |
| Lymphoma, B-Cell                       | Lymphoma, Large-Cell, Diffuse          | 0.98633325 |
| Lymphoma, Non-Hodgkin                  | Multiple Myeloma                       | 0.98473238 |
| Metabolic Syndrome X                   | Myocardial Infarction                  | 0.9845326  |
| Metabolic Syndrome X                   | Obesity                                | 0.98841429 |
| Metabolic Syndrome X                   | Osteoporosis                           | 0.98586218 |
| Multiple Sclerosis                     | Obesity                                | 0.98450463 |
| Obesity                                | Osteoporosis                           | 0.98370033 |
| Obesity                                | Polycystic Ovary Syndrome              | 0.98482318 |
| Obesity                                | Prostatic Neoplasms                    | 0.98429573 |
| Obesity                                | Schizophrenia                          | 0.98484432 |
| Ovarian Neoplasms                      | Pulmonary Disease, Chronic Obstructive | 0.98383284 |
| Ovarian Neoplasms                      | Stomach Neoplasms                      | 0.98742354 |
| Ovarian Neoplasms                      | Urinary Bladder Neoplasms              | 0.98464459 |
| Pulmonary Disease, Chronic Obstructive | Stomach Neoplasms                      | 0.98466255 |
| Pulmonary Disease, Chronic Obstructive | Urinary Bladder Neoplasms              | 0.98766118 |
| Stomach Neoplasms                      | Urinary Bladder Neoplasms              | 0.98465646 |

**Supplementary Table 2:** The mpDisNet-predicted 100 comorbid disease pairs.

| <b>Source</b>                           | <b>Target</b>                          | <b>similarity</b> |
|-----------------------------------------|----------------------------------------|-------------------|
| Alzheimer Disease                       | Long QT Syndrome                       | 0.88377895        |
| Anemia, Sickle Cell                     | Cerebral Infarction                    | 0.959475536       |
| Anemia, Sickle Cell                     | Mental Retardation                     | 0.92063305        |
| Anemia, Sickle Cell                     | Mucocutaneous Lymph Node Syndrome      | 0.937345709       |
| Arthritis, Rheumatoid                   | Friedreich Ataxia                      | 0.883647145       |
| Arthritis, Rheumatoid                   | Long QT Syndrome                       | 0.871775004       |
| Arthritis, Rheumatoid                   | Multiple Endocrine Neoplasia Type 1    | 0.908967166       |
| Arthritis, Rheumatoid                   | Osteogenesis Imperfecta                | 0.898680006       |
| Arthritis, Rheumatoid                   | Telangiectasia, Hereditary Hemorrhagic | 0.865650556       |
| Arthritis, Rheumatoid                   | Thalassemia                            | 0.916529494       |
| Asthma                                  | Multiple Endocrine Neoplasia Type 1    | 0.910167409       |
| Asthma                                  | Telangiectasia, Hereditary Hemorrhagic | 0.867767363       |
| Asthma                                  | Thalassemia                            | 0.921268812       |
| Autistic Disorder                       | DiGeorge Syndrome                      | 0.876359596       |
| Autistic Disorder                       | Long QT Syndrome                       | 0.884154918       |
| Autoimmune Lymphoproliferative Syndrome | Bipolar Disorder                       | 0.862429743       |
| Autoimmune Lymphoproliferative Syndrome | Cataract                               | 0.846010311       |
| Autoimmune Lymphoproliferative Syndrome | Celiac Disease                         | 0.869614916       |
| Autoimmune Lymphoproliferative Syndrome | Crohn Disease                          | 0.877102919       |
| Bipolar Disorder                        | Friedreich Ataxia                      | 0.895441539       |
| Bipolar Disorder                        | Telangiectasia, Hereditary Hemorrhagic | 0.844632261       |
| Bipolar Disorder                        | Thalassemia                            | 0.908394697       |
| Brain Neoplasms                         | Long QT Syndrome                       | 0.877148389       |
| Brain Neoplasms                         | Multiple Endocrine Neoplasia Type 1    | 0.912947692       |
| Brain Neoplasms                         | Osteogenesis Imperfecta                | 0.906857593       |
| Brain Neoplasms                         | Telangiectasia, Hereditary Hemorrhagic | 0.86282811        |
| Brain Neoplasms                         | Thalassemia                            | 0.913234913       |
| Breast Neoplasms                        | Long QT Syndrome                       | 0.878023109       |
| Breast Neoplasms                        | Thalassemia                            | 0.919227692       |
| Burkitt Lymphoma                        | Long QT Syndrome                       | 0.795018148       |
| Cataract                                | Friedreich Ataxia                      | 0.862387952       |
| Cataract                                | Long QT Syndrome                       | 0.846656727       |
| Cataract                                | Multiple Endocrine Neoplasia Type 1    | 0.891000081       |
| Cataract                                | Osteogenesis Imperfecta                | 0.885094657       |
| Cataract                                | Retinitis Pigmentosa                   | 0.88522725        |
| Cataract                                | Telangiectasia, Hereditary Hemorrhagic | 0.83093475        |
| Cataract                                | Thalassemia                            | 0.881922676       |
| Celiac Disease                          | Down Syndrome                          | 0.950323165       |
| Celiac Disease                          | Long QT Syndrome                       | 0.867790085       |
| Celiac Disease                          | Osteogenesis Imperfecta                | 0.895050164       |
| Celiac Disease                          | Retinitis Pigmentosa                   | 0.883439596       |
| Celiac Disease                          | Telangiectasia, Hereditary Hemorrhagic | 0.863223629       |
| Celiac Disease                          | Thalassemia                            | 0.908074923       |
| Cerebral Infarction                     | Friedreich Ataxia                      | 0.893480417       |
| Cerebral Infarction                     | Long QT Syndrome                       | 0.868903821       |
| Cerebral Infarction                     | Multiple Endocrine Neoplasia Type 1    | 0.897789769       |
| Cerebral Infarction                     | Osteogenesis Imperfecta                | 0.901453881       |

|                                     |                                        |             |
|-------------------------------------|----------------------------------------|-------------|
| Cerebral Infarction                 | Retinitis Pigmentosa                   | 0.884800732 |
| Cerebral Infarction                 | Telangiectasia, Hereditary Hemorrhagic | 0.859235693 |
| Cerebral Infarction                 | Thalassemia                            | 0.931756901 |
| Colorectal Neoplasms                | Telangiectasia, Hereditary Hemorrhagic | 0.871068863 |
| Colorectal Neoplasms                | Thalassemia                            | 0.913359088 |
| Crohn Disease                       | Cystic Fibrosis                        | 0.948487942 |
| Crohn Disease                       | Familial Mediterranean Fever           | 0.903763634 |
| Crohn Disease                       | Long QT Syndrome                       | 0.877117859 |
| Crohn Disease                       | Retinitis Pigmentosa                   | 0.858360243 |
| Crohn Disease                       | Telangiectasia, Hereditary Hemorrhagic | 0.855701262 |
| Crohn Disease                       | Thalassemia                            | 0.914728173 |
| Cystic Fibrosis                     | Mental Retardation                     | 0.946905933 |
| DiGeorge Syndrome                   | Mental Retardation                     | 0.880473087 |
| DiGeorge Syndrome                   | Osteoarthritis                         | 0.877733149 |
| DiGeorge Syndrome                   | Schizophrenia                          | 0.884501597 |
| Down Syndrome                       | Mental Retardation                     | 0.946847286 |
| Epilepsy                            | Long QT Syndrome                       | 0.896304609 |
| Epilepsy                            | Osteogenesis Imperfecta                | 0.881573118 |
| Epilepsy                            | Telangiectasia, Hereditary Hemorrhagic | 0.847149935 |
| Epilepsy                            | Thalassemia                            | 0.900623545 |
| Friedreich Ataxia                   | Glaucoma                               | 0.886288654 |
| Friedreich Ataxia                   | Mental Retardation                     | 0.871810639 |
| Glaucoma                            | Long QT Syndrome                       | 0.875035008 |
| Glaucoma                            | Multiple Endocrine Neoplasia Type 1    | 0.894753529 |
| Gout                                | Long QT Syndrome                       | 0.861469602 |
| Gout                                | Retinitis Pigmentosa                   | 0.846508532 |
| Gout                                | Telangiectasia, Hereditary Hemorrhagic | 0.846711676 |
| Gout                                | Thalassemia                            | 0.871380227 |
| Kidney Neoplasms                    | Long QT Syndrome                       | 0.852654094 |
| Kidney Neoplasms                    | Telangiectasia, Hereditary Hemorrhagic | 0.848121554 |
| Kidney Neoplasms                    | Thalassemia                            | 0.888938627 |
| Long QT Syndrome                    | Lung Neoplasms                         | 0.879435196 |
| Long QT Syndrome                    | Mental Retardation                     | 0.900263417 |
| Long QT Syndrome                    | Mucocutaneous Lymph Node Syndrome      | 0.869763547 |
| Long QT Syndrome                    | Osteoarthritis                         | 0.868596049 |
| Long QT Syndrome                    | Prostatic Neoplasms                    | 0.873711733 |
| Long QT Syndrome                    | Psoriasis                              | 0.876188572 |
| Long QT Syndrome                    | Schizophrenia                          | 0.889944888 |
| Long QT Syndrome                    | Uterine Neoplasms                      | 0.894333596 |
| Lung Neoplasms                      | Thalassemia                            | 0.920317475 |
| Mental Retardation                  | Osteogenesis Imperfecta                | 0.872733159 |
| Mental Retardation                  | Retinitis Pigmentosa                   | 0.864296155 |
| Mental Retardation                  | Thalassemia                            | 0.91636092  |
| Mucocutaneous Lymph Node Syndrome   | Thalassemia                            | 0.909956341 |
| Multiple Endocrine Neoplasia Type 1 | Stomach Neoplasms                      | 0.918279365 |
| Osteoarthritis                      | Telangiectasia, Hereditary Hemorrhagic | 0.857912694 |
| Osteoarthritis                      | Thalassemia                            | 0.904729914 |
| Prostatic Neoplasms                 | Thalassemia                            | 0.917720917 |

|                                        |                                        |             |
|----------------------------------------|----------------------------------------|-------------|
| Psoriasis                              | Telangiectasia, Hereditary Hemorrhagic | 0.861097381 |
| Psoriasis                              | Thalassemia                            | 0.90872626  |
| Telangiectasia, Hereditary Hemorrhagic | Uterine Neoplasms                      | 0.868010995 |
| Bipolar Disorder                       | Long QT Syndrome                       | 0.884813424 |
| Bipolar Disorder                       | Osteogenesis Imperfecta                | 0.885962878 |

**Supplementary Table 3:** The 66 clinically reported disease-disease pairs.

| <b>Disease1</b>                        | <b>mesh.id1</b> | <b>Disease2</b>                        | <b>mesh.id2</b> |
|----------------------------------------|-----------------|----------------------------------------|-----------------|
| Alzheimer Disease                      | D000544         | Schizophrenia                          | D012559         |
| Alzheimer Disease                      | D000544         | Mental Retardation                     | D008607         |
| Alzheimer Disease                      | D000544         | Brain Diseases                         | D001927         |
| Alzheimer Disease                      | D000544         | Bipolar Disorder                       | D001714         |
| Alzheimer Disease                      | D000544         | Diabetic Nephropathies                 | D003928         |
| Alzheimer Disease                      | D000544         | Epilepsy                               | D004827         |
| Alzheimer Disease                      | D000544         | Diabetes Mellitus                      | D003920         |
| Anemia                                 | D000740         | Endometriosis                          | D004715         |
| Asthma                                 | D001249         | Arthritis, Rheumatoid                  | D001172         |
| Asthma                                 | D001249         | Diabetes Mellitus                      | D003920         |
| Asthma                                 | D001249         | Obesity                                | D009765         |
| Asthma                                 | D001249         | Pulmonary Disease, Chronic Obstructive | D029424         |
| Bipolar Disorder                       | D001714         | Schizophrenia                          | D012559         |
| Brain Diseases                         | D001927         | Lipid Metabolism, Inborn Errors        | D008052         |
| Brain Diseases                         | D001927         | Diabetes Mellitus                      | D003920         |
| Cardiomyopathy, Dilated                | D002311         | Hyperlipoproteinemia Type III          | D006952         |
| Cardiomyopathy, Dilated                | D002311         | Diabetic Nephropathies                 | D003928         |
| Cardiomyopathy, Dilated                | D002311         | Myocardial Infarction                  | D009203         |
| Cardiomyopathy, Dilated                | D002311         | Diabetes Mellitus                      | D003920         |
| Cardiomyopathy, Dilated                | D002311         | Lipid Metabolism, Inborn Errors        | D008052         |
| Cardiomyopathy, Dilated                | D002311         | Obesity                                | D009765         |
| Pulmonary Disease, Chronic Obstructive | D029424         | Arthritis, Rheumatoid                  | D001172         |
| Pulmonary Disease, Chronic Obstructive | D029424         | Myocardial Infarction                  | D009203         |
| Diabetes Mellitus                      | D003920         | Obesity                                | D009765         |
| Diabetes Mellitus                      | D003920         | Lipid Metabolism, Inborn Errors        | D008052         |
| Diabetic Nephropathies                 | D003928         | Myocardial Infarction                  | D009203         |
| Diabetic Nephropathies                 | D003928         | Diabetes Mellitus                      | D003920         |
| Diabetic Nephropathies                 | D003928         | Lipid Metabolism, Inborn Errors        | D008052         |
| Diabetic Nephropathies                 | D003928         | Obesity                                | D009765         |
| Endometriosis                          | D004715         | Arthritis, Rheumatoid                  | D001172         |
| Epilepsy                               | D004827         | Multiple Sclerosis                     | D009103         |
| Epilepsy                               | D004827         | Brain Diseases                         | D001927         |
| Epilepsy                               | D004827         | Schizophrenia                          | D012559         |
| Huntington Disease                     | D006816         | Mental Retardation                     | D008607         |
| Huntington Disease                     | D006816         | Epilepsy                               | D004827         |
| Huntington Disease                     | D006816         | Diabetic Nephropathies                 | D003928         |
| Huntington Disease                     | D006816         | Bipolar Disorder                       | D001714         |



|                                 |         |                                        |         |
|---------------------------------|---------|----------------------------------------|---------|
| Huntington Disease              | D006816 | Schizophrenia                          | D012559 |
| Hyperlipoproteinemia Type III   | D006952 | Diabetes Mellitus                      | D003920 |
| Hyperlipoproteinemia Type III   | D006952 | Lipid Metabolism, Inborn Errors        | D008052 |
| Hyperlipoproteinemia Type III   | D006952 | Myocardial Infarction                  | D009203 |
| Hyperlipoproteinemia Type III   | D006952 | Obesity                                | D009765 |
| Hyperlipoproteinemia Type III   | D006952 | Diabetic Nephropathies                 | D003928 |
| Hyperlipoproteinemia Type III   | D006952 | Brain Diseases                         | D001927 |
| Infertility, Male               | D007248 | Obesity                                | D009765 |
| Infertility, Male               | D007248 | Hyperlipoproteinemia Type III          | D006952 |
| Infertility, Male               | D007248 | Cystic Fibrosis                        | D003550 |
| Infertility, Male               | D007248 | Diabetic Nephropathies                 | D003928 |
| Lipid Metabolism, Inborn Errors | D008052 | Obesity                                | D009765 |
| Malaria, Cerebral               | D016779 | Epilepsy                               | D004827 |
| Malaria, Cerebral               | D016779 | Anemia                                 | D000740 |
| Mental Retardation              | D008607 | Bipolar Disorder                       | D001714 |
| Mental Retardation              | D008607 | Schizophrenia                          | D012559 |
| Multiple Sclerosis              | D009103 | Diabetes Mellitus                      | D003920 |
| Myocardial Infarction           | D009203 | Diabetes Mellitus                      | D003920 |
| Myocardial Infarction           | D009203 | Obesity                                | D009765 |
| Myocardial Infarction           | D009203 | Lipid Metabolism, Inborn Errors        | D008052 |
| Polycystic Kidney Diseases      | D007690 | Diabetes Mellitus                      | D003920 |
| Polycystic Ovary Syndrome       | D011085 | Obesity                                | D009765 |
| Polycystic Ovary Syndrome       | D011085 | Diabetes Mellitus                      | D003920 |
| Polycystic Ovary Syndrome       | D011085 | Diabetic Nephropathies                 | D003928 |
| Polycystic Ovary Syndrome       | D011085 | Myocardial Infarction                  | D009203 |
| Polycystic Ovary Syndrome       | D011085 | Lipid Metabolism, Inborn Errors        | D008052 |
| Arthritis, Rheumatoid           | D001172 | Diabetes Mellitus                      | D003920 |
| Sarcoidosis, Pulmonary          | D017565 | Cardiomyopathy, Dilated                | D002311 |
| Sarcoidosis, Pulmonary          | D017565 | Pulmonary Disease, Chronic Obstructive | D029424 |

**Supplementary Table 4:** The 52 new clinically reported disease-disease pairs.

| <b>disease1</b>                        | <b>mesh.id1</b> | <b>disease2</b>                        | <b>mesh.id2</b> |
|----------------------------------------|-----------------|----------------------------------------|-----------------|
| Muscular Atrophy, Spinal               | D009134         | Adenoma                                | D000236         |
| Adrenal Cortex Neoplasms               | D000306         | Arthritis                              | D001168         |
| Asthma                                 | D001249         | Arthritis, Rheumatoid                  | D001172         |
| Endometriosis                          | D004715         | Arthritis, Rheumatoid                  | D001172         |
| Pulmonary Disease, Chronic Obstructive | D029424         | Arthritis, Rheumatoid                  | D001172         |
| Alzheimer Disease                      | D000544         | Bipolar Disorder                       | D001714         |
| Huntington Disease                     | D006816         | Bipolar Disorder                       | D001714         |
| Lymphoma, Non-Hodgkin                  | D008228         | Carcinoma, Renal Cell                  | D002292         |
| Osteoporosis                           | D010024         | Cardiomyopathies                       | D009202         |
| Ovarian Diseases                       | D010049         | Cardiomyopathy, Hypertrophic           | D002312         |
| Infertility, Male                      | D007248         | Cystic Fibrosis                        | D003550         |
| Alzheimer Disease                      | D000544         | Diabetes Mellitus                      | D003920         |
| Arthritis, Rheumatoid                  | D001172         | Diabetes Mellitus                      | D003920         |
| Asthma                                 | D001249         | Diabetes Mellitus                      | D003920         |
| Cardiomyopathy, Dilated                | D002311         | Diabetes Mellitus                      | D003920         |
| Multiple Sclerosis                     | D009103         | Diabetes Mellitus                      | D003920         |
| Myocardial Infarction                  | D009203         | Diabetes Mellitus                      | D003920         |
| Polycystic Kidney Diseases             | D007690         | Diabetes Mellitus                      | D003920         |
| Polycystic Ovary Syndrome              | D011085         | Diabetes Mellitus                      | D003920         |
| Anemia                                 | D000740         | Endometriosis                          | D004715         |
| Sjogren's Syndrome                     | D012859         | Glioblastoma                           | D005909         |
| Dengue Hemorrhagic Fever               | D019595         | Hepatitis E                            | D016751         |
| Atherosclerosis                        | D050197         | Influenza, Human                       | D007251         |
| Atherosclerosis                        | D050197         | Ischemia                               | D007511         |
| Adenoma                                | D000236         | Lymphoma, Non-Hodgkin                  | D008228         |
| Thyroid Neoplasms                      | D013964         | Mastocytosis, Systemic                 | D034721         |
| Carcinoma, Renal Cell                  | D002292         | Meningioma                             | D008579         |
| Long QT Syndrome                       | D008133         | Meningioma                             | D008579         |
| Encephalitis                           | D004660         | Meningitis                             | D008581         |
| Pneumonia                              | D011014         | Meningitis                             | D008581         |
| Cardiomyopathy, Dilated                | D002311         | Myocardial Infarction                  | D009203         |
| Polycystic Ovary Syndrome              | D011085         | Myocardial Infarction                  | D009203         |
| Pulmonary Disease, Chronic Obstructive | D029424         | Myocardial Infarction                  | D009203         |
| Peritonitis                            | D010538         | Narcolepsy                             | D009290         |
| Asthma                                 | D001249         | Obesity                                | D009765         |
| Cardiomyopathy, Dilated                | D002311         | Obesity                                | D009765         |
| Diabetes Mellitus                      | D003920         | Obesity                                | D009765         |
| Infertility, Male                      | D007248         | Obesity                                | D009765         |
| Myocardial Infarction                  | D009203         | Obesity                                | D009765         |
| Polycystic Ovary Syndrome              | D011085         | Obesity                                | D009765         |
| Thalassemia                            | D013789         | Ovarian Neoplasms                      | D010051         |
| Nephrolithiasis                        | D053040         | Pemphigus                              | D010392         |
| Autistic Disorder                      | D001321         | Peripheral Nervous System Disorders    | D010523         |
| Influenza, Human                       | D007251         | Pneumonia                              | D011014         |
| Asthma                                 | D001249         | Pulmonary Disease, Chronic Obstructive | D029424         |
| Immune System Diseases                 | D007154         | Pulmonary Heart Disease                | D011660         |
| Alzheimer Disease                      | D000544         | Schizophrenia                          | D012559         |
| Bipolar Disorder                       | D001714         | Schizophrenia                          | D012559         |
| Huntington Disease                     | D006816         | Schizophrenia                          | D012559         |
| Dengue Hemorrhagic Fever               | D019595         | Testicular Neoplasms                   | D013736         |

Diabetes, Gestational  
Adrenal Cortex Neoplasms

D016640 Varicocele  
D000306 Vasculitis

D014646  
D014657
